# Supplementary material for: Multi-stimuli responsive supramolecular polymers and their electrospun nanofibers
Source: Royal Society of Chemistry journal article supplement (doi:10.1039/c6py00445h), 2016-01-01
Supplement: c6py00445h1.pdf [file c6py00445h1.pdf]

## Multi-stimuli responsive supramolecular polymers and their electrospun nanofibers

Jianzhuang Chen,<sup>a</sup> Shuangshuang Zhang,<sup>b</sup> Fugen Sun,<sup>a</sup> Nan Li,<sup>a</sup> Kun Cui,<sup>b</sup> Jianping He,<sup>a</sup> Dechao Niu<sup>a</sup> and Yongsheng Li<sup>\*a</sup>

<sup>a</sup> *Laboratory of Low-Dimensional Materials Chemistry, School of Materials Science and Engineering, East China University of Science and Technology, Shanghai, 200237, P. R. China. Fax and Tel: +86-21-6425-0740; E-mail: ysli@ecust.edu.cn*

<sup>b</sup> *Key Laboratory of Synthetic and Self-Assembly Chemistry for Organic Functional Molecules, Shanghai Institute of Organic Chemistry, Chinese Academy of Sciences, Shanghai, 200032, P. R. China*

### Electronic Supplementary Information

|                                                                                      |    |
|--------------------------------------------------------------------------------------|----|
| 1. Materials and methods                                                             | S2 |
| 2. Synthetic routes to macromonomers and their neutral macromonomers                 | S3 |
| 3. <sup>1</sup> H NMR spectra of <b>MRSPs</b> and their neutral macromonomers        | S4 |
| 4. GPC traces of neutral macromonomers                                               | S6 |
| 5. Concentration dependent <sup>1</sup> H NMR experiments of <b>MRSP2</b>            | S6 |
| 6. Cation-, pH-, and anion-responsive <sup>1</sup> H NMR experiments of <b>MRSP2</b> | S7 |
| 7. Variable temperature <sup>1</sup> H NMR spectra of <b>MRSP2</b>                   | S8 |
| 8. DSC curves of <b>MRSPs</b> and their neutral macromonomers                        | S8 |
| 9. References                                                                        | S8 |

#### 1. Materials and methods

All reagents were commercially available and used as supplied without further purification.

macromonomer **1**, macromonomer **2**, neutral macromonomer **3** ( $M_{n, \text{GPC}} = 5.5$  kDa,  $M_w/M_n = 1.16$ ,  $n = 43$ ;  $M_{\text{NMR}} = 3.9$  kDa,  $n_{\text{NMR}} = 29$ ,  $n$  donates the unit number of PCL) and neutral macromonomer **4** ( $M_{n, \text{GPC}} = 7.1$  kDa,  $M_w/M_n = 1.23$ ,  $n = 57$ ;  $M_{\text{NMR}} = 5.0$  kDa,  $n_{\text{NMR}} = 39$ ) were prepared according to the published procedures.<sup>S3</sup> NMR spectra were recorded with a Bruker Advance DMX 500 spectrophotometer or a Bruker Advance DMX 400 spectrophotometer using the deuterated solvents as the lock and the residual solvents or TMS as the internal reference. Viscosity measurements were carried out with a Cannon-Ubbelohde semi-micro dilution viscometer at 25 °C in chloroform. The optical photographs were taken with an Olympus BX-51 optical microscope and the samples were placed between a glass slide and a glass cover for observation. Molecular weights and molecular weight distributions were determined by gel permeation chromatography (GPC) with a Waters 1515 pump and Waters 2414 differential refractive index detector relative to linear PS standards. GPC was performed at 40 °C using THF as eluent at a flow rate of 1.0 mL/min. Differential Scanning Calorimetry (DSC) measurements were conducted on a Perkin-Elmer DSC 8500 instrument in a dry nitrogen atmosphere. Indium and tin standards were used for calibration for low and high-temperature regions, respectively. All samples were first heated to 90 °C from 30 °C at a rate of 30 °C/min and kept at that temperature for 3 min; subsequently, they were cooled to -70 °C from 90 °C at a rate of -10 °C/min and kept at that temperature for 5 min; then they were reheated to 90 °C at a rate of 10 °C/min. The crystallization temperature ( $T_c$ ) was taken as the minimum of the exothermic peak, whereas the melting temperature ( $T_m$ ) was taken as the maximum of the endothermic peak. The crystallization and melting temperatures were determined from the second and third temperature cycles. Field-emission scanning electron microscopy (FE-SEM) images were obtained using a Hitachi S4800 instrument (Japan) operating at an accelerating voltage of 3.0 kV.

Preparation of nanofibers by Electrospinning: The sample (**MRSP1** or **3**) was dissolved in  $\text{CHCl}_3$  at the designed concentration. The electrical field was generated by a variable high voltage power supply (DW-P403-3ACDF). The applied voltage was 12 kV and the distance between the spinneret and the grounded plate was 15 cm. All solutions are fed by NE-1000 syringe pumps at 2.0 mL/h.

## 2. Synthetic routes to macromonomers and their neutral macromonomers

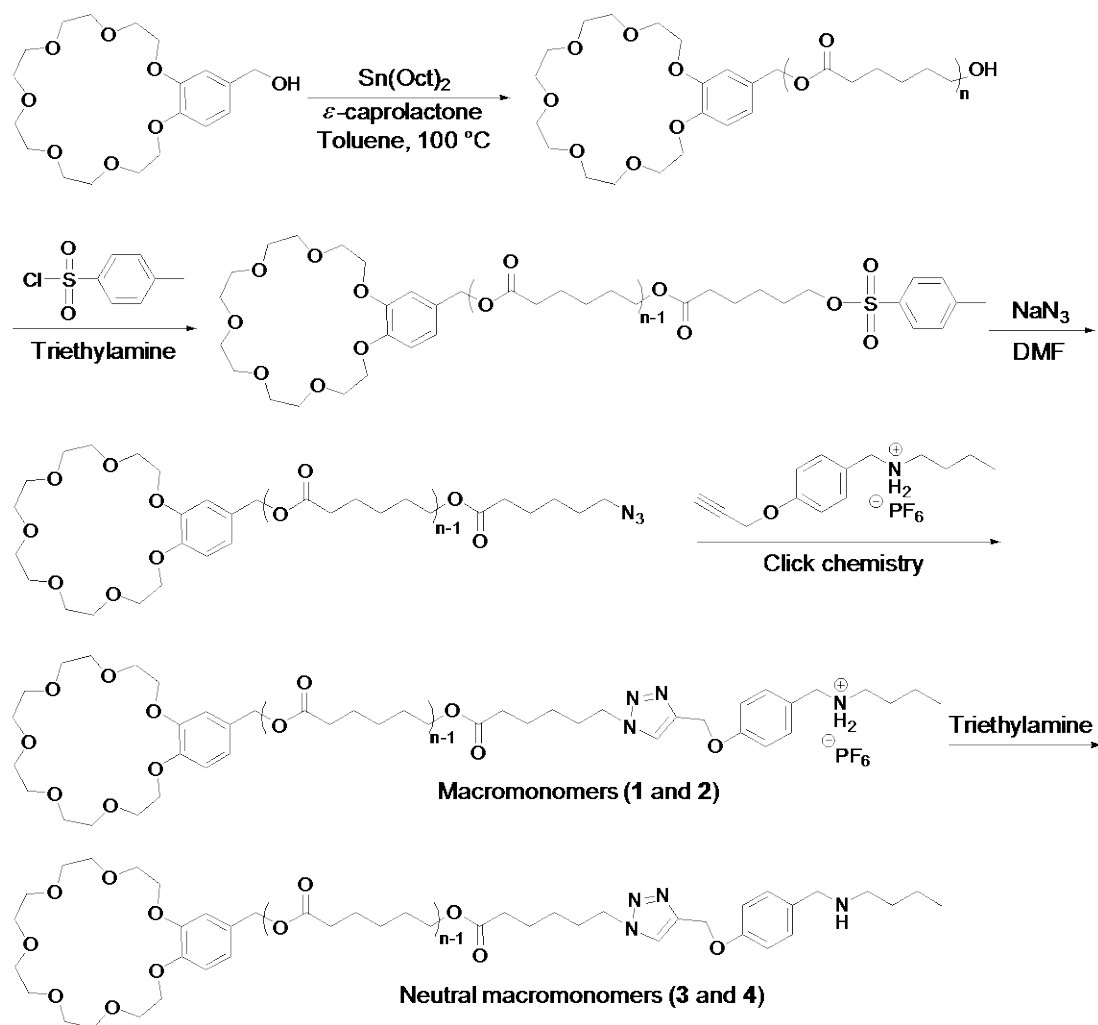

**Scheme S1.** Synthetic routes to macromonomers (1 and 2) of multi-stimuli responsive supramolecular polymers (MRSP1 and MRSP2) and their corresponding neutral macromonomers (3 and 4) by a combination of ring-opening polymerization and click reaction.<sup>S1-S3</sup>

### 3. <sup>1</sup>H NMR spectra of MRSPs and their neutral macromonomers

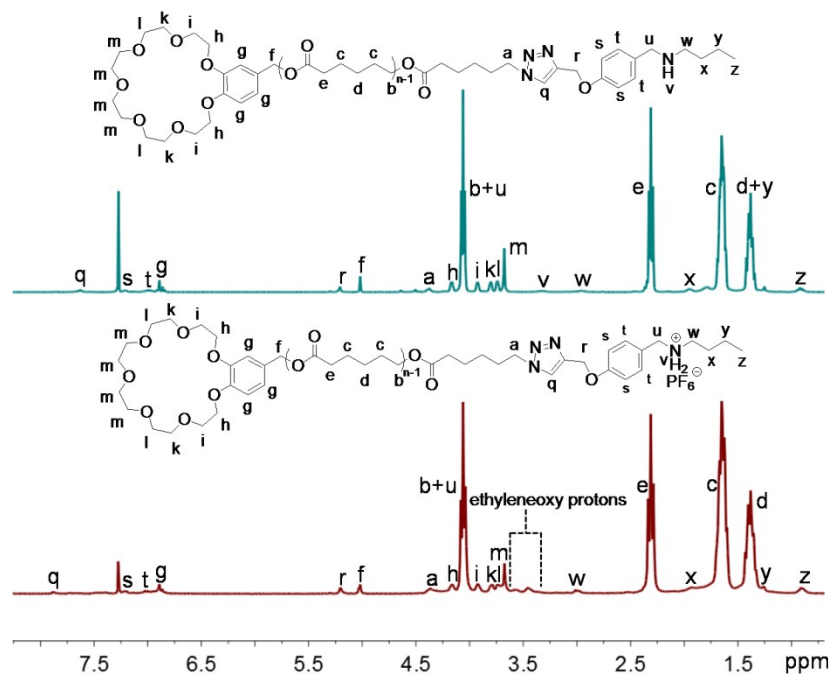

**Fig. S1.** Partial  $^1\text{H}$  NMR (400 MHz,  $\text{CDCl}_3$ , 293 K) spectra of macromonomer **1** (20.0 g/L, bottom) and its neutral macromonomer **3** (20.0 g/L, top).

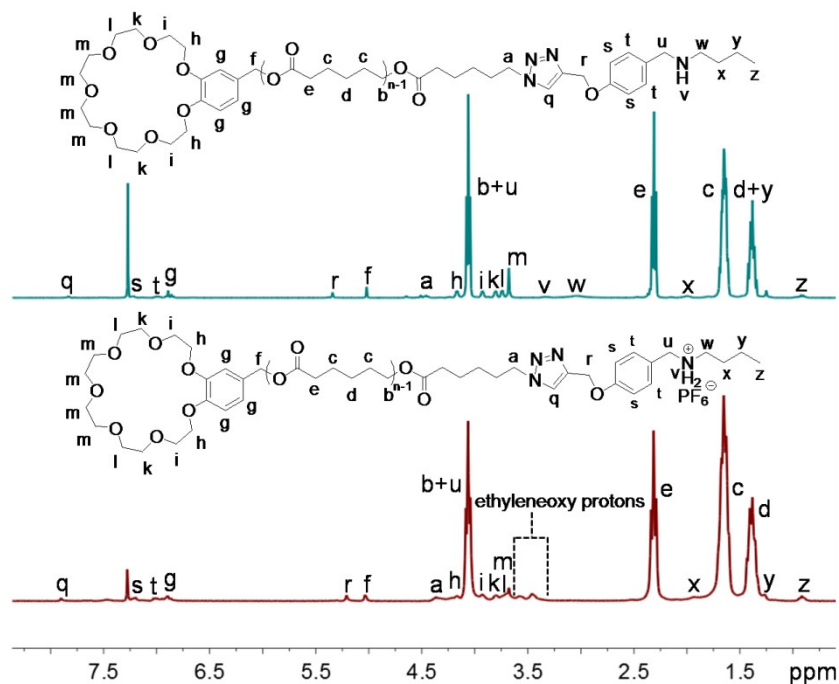

**Fig. S2.** Partial  $^1\text{H}$  NMR (400 MHz,  $\text{CDCl}_3$ , 293 K) spectra of macromonomer **2** (20.0 g/L, bottom) and its neutral macromonomer **4** (20.0 g/L, top).

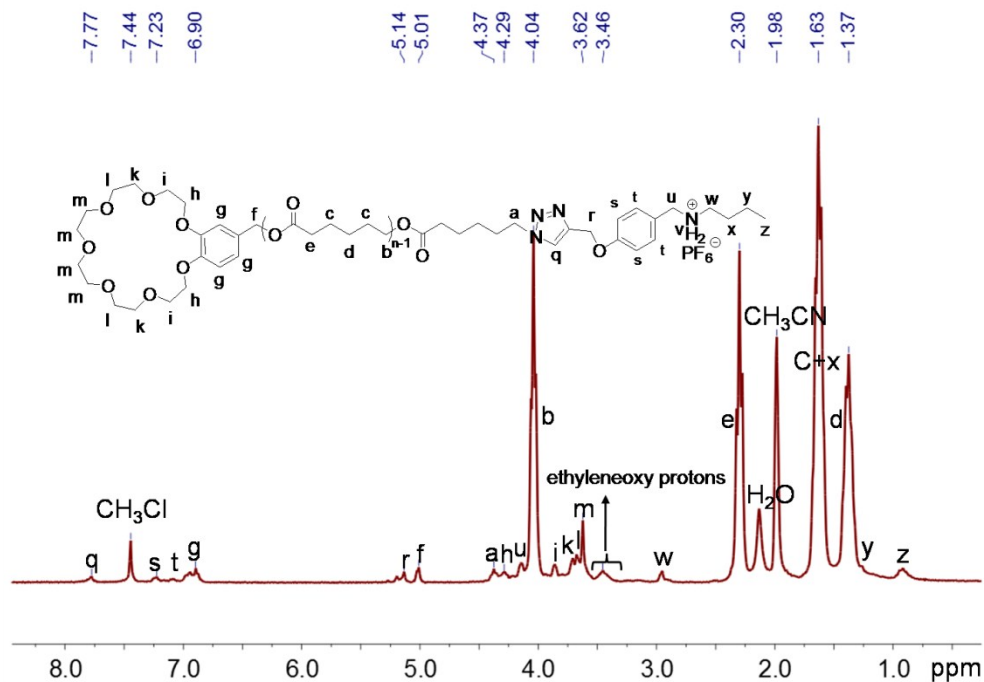

**Fig. S3.** Partial <sup>1</sup>H NMR (400 MHz, CDCl<sub>3</sub>:CD<sub>3</sub>CN = 2:1 (v/v), 293 K) spectrum of macromonomer **1** (20.0 g/L).

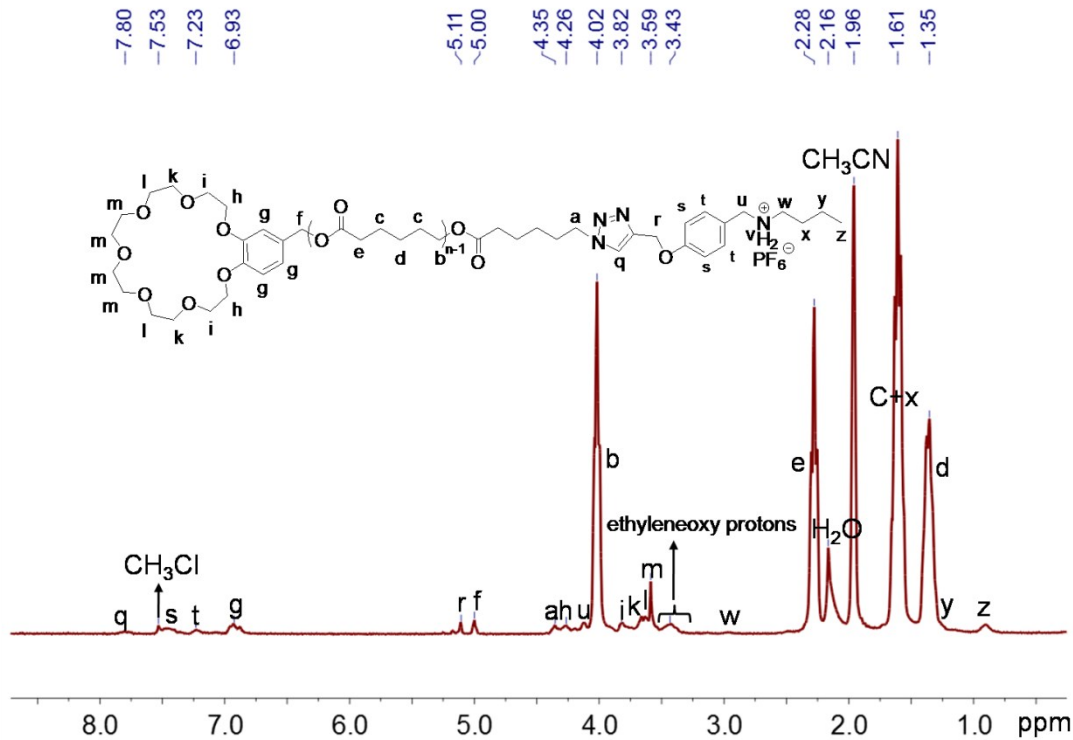

**Fig. S4.** Partial <sup>1</sup>H NMR (400 MHz, CDCl<sub>3</sub>:CD<sub>3</sub>CN = 2:1 (v/v), 293 K) spectrum of macromonomer **2** (20.0 g/L).

#### 4. GPC traces of neutral macromonomers

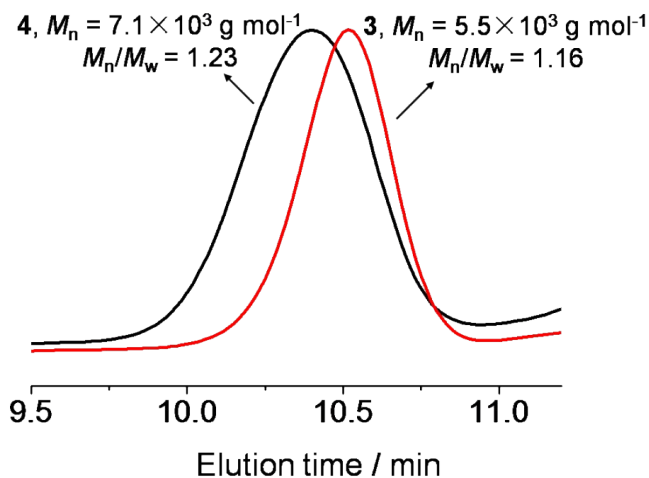

**Fig. S5.** GPC traces of neutral macromonomers (**3** and **4**).

#### 5. Concentration dependent $^1\text{H}$ NMR experiments of **MRSP2**

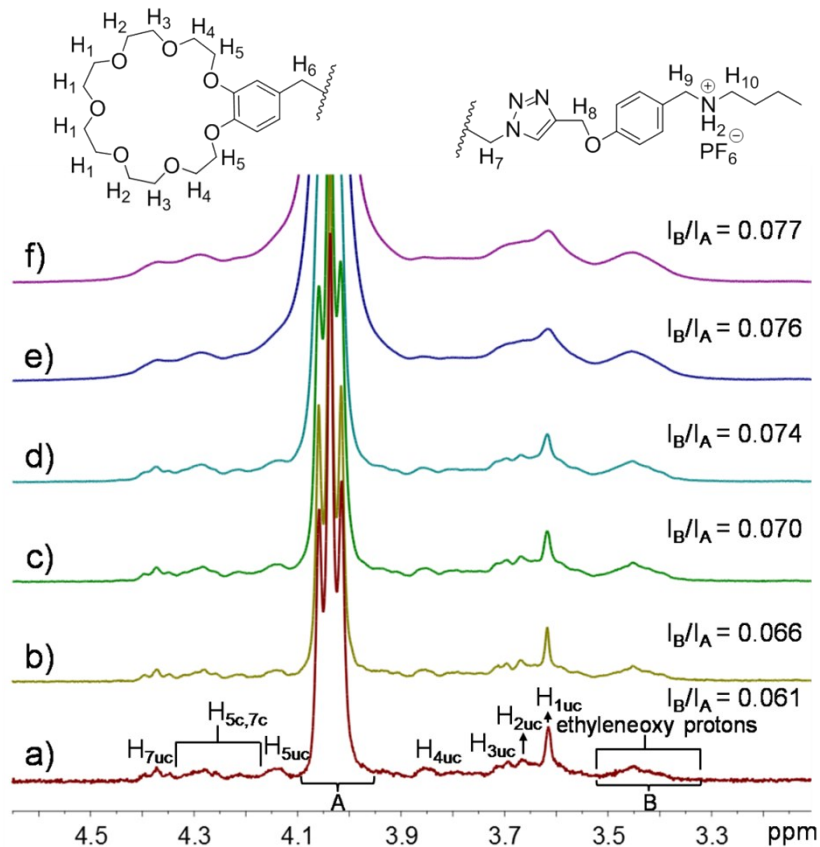

**Fig. S6.** Partial  $^1\text{H}$  NMR (400 MHz,  $\text{CDCl}_3:\text{CD}_3\text{CN} = 2:1$  (v/v), 293 K) spectra of **MRSP2** at different concentrations: a) 5.00 g/L; b) 10.0 g/L; c) 20.0 g/L; d) 40.0 g/L; e) 80.0 g/L; f) 120 g/L. Complexed and uncomplexed moieties are denoted by “c” and “uc”, respectively.

6. Cation-, pH-, and anion-responsive  $^1\text{H}$  NMR experiments of **MRSP2**

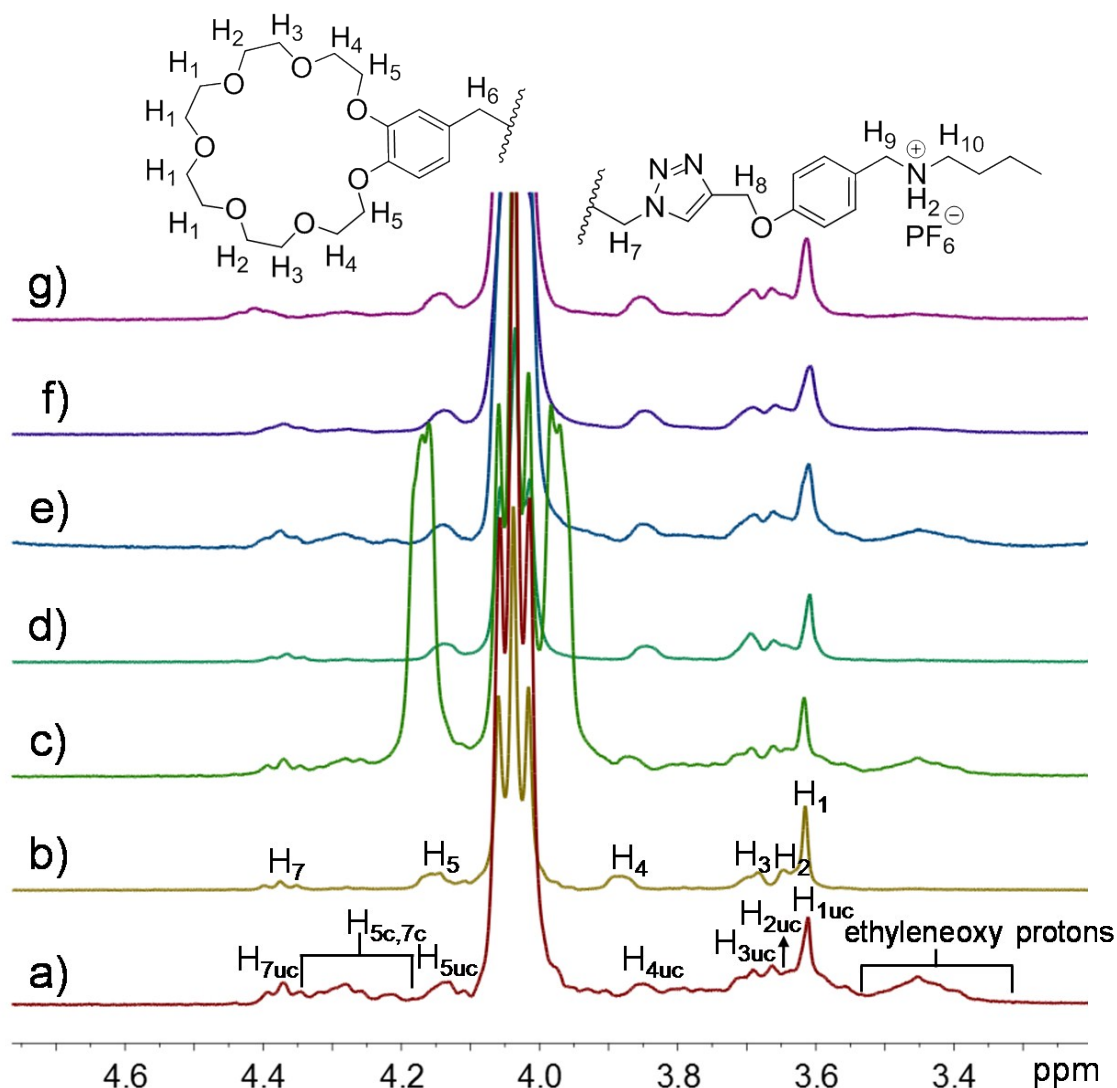

**Fig. S7.** Partial  $^1\text{H}$  NMR (400 MHz,  $\text{CDCl}_3:\text{CD}_3\text{CN} = 2:1$  (v/v), 293 K) spectra: a) **MRSP2** (20.0 g/L); b) after addition of 1.5 equiv.  $\text{KPF}_6$  to a; c) after addition of 2.0 equiv. of DB18C6 to b; d) after addition of 1.5 equiv. of  $\text{Et}_3\text{N}$  to a; e) after addition of 2.0 equiv. of  $\text{CF}_3\text{COOH}$  to d; f) after addition of 1.5 equiv. of TBACl to a; g) after addition of 2.0 equiv. of  $\text{AgPF}_6$  to f; Complexed and uncomplexed moieties are denoted by “c” and “uc”, respectively.

### 7. Partial variable temperature $^1\text{H}$ NMR spectra of **MRSP2**

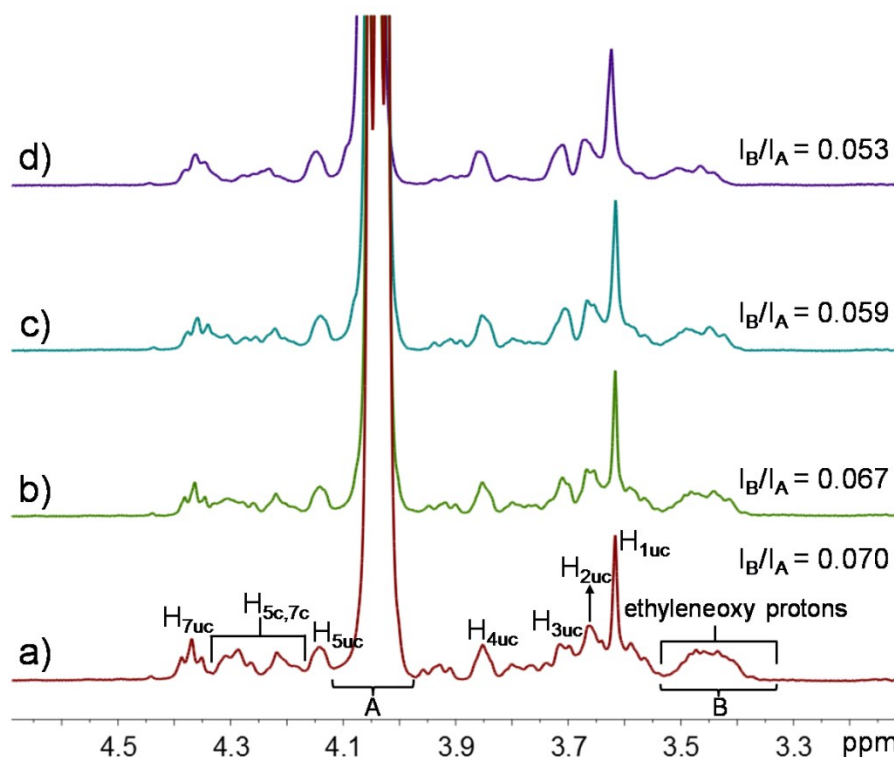

**Fig. S8.** Partial variable temperature  $^1\text{H}$  NMR spectra of **MRSP2** (20.0 g/L, 500 MHz,  $\text{CDCl}_3:\text{CD}_3\text{CN} = 2:1$  (v/v)): a) 293 K, b) 303 K, c) 313 K, d) 323 K. Complexed and uncomplexed moieties are denoted by “c” and “uc”, respectively.

### 8. DSC curves of **MRSPs** and their neutral macromonomers

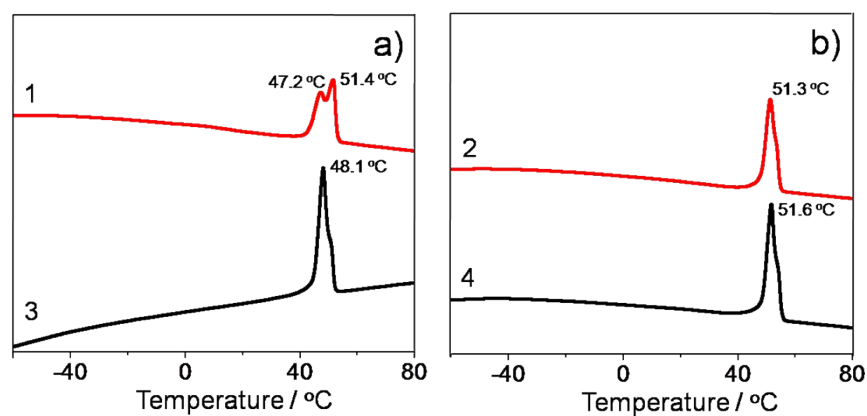

**Fig. S9.** DSC curves of **MRSP1** and its neutral macromonomer **3** a); **MRSP2** and its neutral macromonomer **4** b) in the heating process.

### 9. References

- S1. Z. Ge, J. Hu, F. Huang and S. Liu, *Angew. Chem., Int. Ed.*, 2009, **48**, 1798.
- S2. X. Yan, D. Xu, X. Chi, J. Chen, S. Dong, X. Ding, Y. Yu and F. Huang, *Adv. Mater.*, 2012, **24**, 362.
- S3. J. Chen, X. Yan, X. Chi, X. Wu, M. Zhang, C. Han, B. Hu, Y. Yu and F. Huang, *Polym. Chem.*, 2012, **3**, 3175.
